# Supplementary material
Source: publisher figshare collection journal article supplement (https://tandf.figshare.com/ndownloader/files/16840766)
Supplement: Supplementary file 1 [file 16840766]

**Virus detections**

Viral tests included quantitative real-time plasma PCR tests as described previously for CMV 1, EBV 2, BKV 3. We used primarily a qualitative in-house PCR for adenovirus and continued with quantitative PCR if positive. HHV-6 was measured with whole-blood real-time quantative PCR, as described previously 4. Urine was also tested, for polyomaviruses BKV and JCV by quantitative PCR 3.

**References**

1. Mannonen L, Loginov R, Helantera I, et al. Comparison of two quantitative real-time CMV-PCR tests calibrated against the 1st WHO international standard for viral load monitoring of renal transplant patients. *Journal of medical virology.* 2014;86(4):576-584.

2. Loginov R, Aalto S, Piiparinen H, et al. Monitoring of EBV-DNAemia by quantitative real-time PCR after adult liver transplantation. *J Clin Virol.* 2006;37(2):104-108.

3. Dumoulin A, Hirsch HH. Reevaluating and optimizing polyomavirus BK and JC real-time PCR assays to detect rare sequence polymorphisms. *J Clin Microbiol.* 2011;49(4):1382-1388.

4. Karlsson T, Mannonen L, Loginov R, et al. Development of a new quantitative real-time HHV-6-PCR and monitoring of HHV-6 DNAaemia after liver transplantation. *J Virol Methods.* 2012;181(1):25-36.
